# Supplementary material for: Selection signatures in two oldest Russian native cattle breeds revealed using high-density single nucleotide polymorphism analysis
Source: PLoS One. 2020 Nov 16;15(11):e0242200. doi: 10.1371/journal.pone.0242200 (PMC7668599; doi:10.1371/journal.pone.0242200)
Supplement: S3 Table — Note: breed: HOL, Holsteins; KHLM, Kholmogor; YRSL, Yaroslavl. (XLSX) [file pone.0242200.s007.xlsx]

## Sheet: YRSLvsKHLM x YRSLvsHOL
SNP	CHR	POS	NMISS	FST
BovineHD0100005004	1	16482371	56	0,832928
BovineHD0100013672	1	48405703	55	0,75579
BovineHD0100013673	1	48406916	56	0,740727
BovineHD0100013674	1	48414894	56	0,740727
BovineHD0100013675	1	48419401	56	0,698976
Hapmap59092-rs29024583	1	48425887	56	0,698976
BovineHD0100013676	1	48430472	54	0,705254
UA-IFASA-1524	1	48474868	55	0,691234
BovineHD0100013693	1	48487923	56	0,678024
BovineHD0100013697	1	48497958	56	0,678024
BovineHD0600014601	6	53203538	56	0,810076
BovineHD0600019977	6	71857162	56	0,763143
ARS-BFGL-NGS-95965	6	72028756	56	0,797227
BovineHD0700028562	7	97914933	56	0,802926
BovineHD0800032651	8	108663779	54	0,837746
BovineHD0800032655	8	108682067	56	0,801918
BovineHD0800032657	8	108687702	56	0,801918
BovineHD0800032661	8	108700965	56	0,801918
BovineHD1100024059	11	83577063	56	0,668601
BovineHD1300002614	13	9724562	56	0,687793
ARS-BFGL-NGS-38288	15	18108465	56	0,802848
BovineHD1500004617	15	18245902	56	0,727156
BovineHD1600004505	16	16632228	56	0,67013
BovineHD1600004509	16	16640680	56	0,67013
BovineHD1600010310	16	35867124	56	0,717371
BovineHD1600010311	16	35868897	56	0,717371
BovineHD1600010312	16	35869388	56	0,717371
BovineHD1700012658	17	45600320	56	0,669022
BovineHD1900016479	19	58080810	56	0,670434
ARS-BFGL-NGS-1388	24	9732103	56	0,674181
BovineHD2400002757	24	9740339	56	0,674181
ARS-BFGL-NGS-32551	26	42274097	56	0,698199
BovineHD4100018575	28	23223000	56	0,770998
BovineHD2800008711	28	32857714	56	0,697056
BovineHD2800010233	28	37340644	56	0,666453
BovineHD2800010240	28	37368495	56	0,666453
BovineHD2800010242	28	37374200	56	0,666453

## Sheet: YRSLvsKHLM x KHLMvsHOL
SNP	CHR	POS	NMISS	FST
BovineHD0300017710	3	58912462	56	0,781028
BovineHD1600005942	16	21252491	56	0,780591
ARS-BFGL-NGS-93130	16	21253270	56	0,780591
BovineHD1800008356	18	26952778	52	0,736312
BovineHD2000010192	20	35669923	56	0,656051
BovineHD2000010194	20	35676040	56	0,656051
BovineHD2000010195	20	35678985	56	0,656051
Hapmap42245-BTA-53403	21	10565190	56	0,677921
BovineHD2400011597	24	41736061	56	0,66284
BovineHD2500006980	25	24735450	56	0,78913

## Sheet: KHLMvsHOL x YRSLvsHOL
SNP	CHR	POS	NMISS	FST
BovineHD0200018819	2	65099139	56	0,702812
BovineHD0200018820	2	65100425	56	0,702812
BovineHD0200018822	2	65105833	56	0,702812
BovineHD0600008209	6	29458069	56	0,71444
BovineHD4100006139	7	64792083	56	0,737298
BovineHD1100025047	11	87179696	56	0,729341
BovineHD1100025049	11	87184974	56	0,729341
BovineHD1200001254	12	4100293	56	0,700678
BovineHD1200001255	12	4102247	56	0,700678
BovineHD1600019280	16	68113026	56	0,697912
BovineHD1600019282	16	68118805	56	0,697912
BovineHD1600019284	16	68121744	56	0,697912
BovineHD1700010941	17	40088514	56	0,760475
BovineHD1700010943	17	40091200	56	0,760475
BovineHD1700010945	17	40099224	56	0,760475
BovineHD1700010946	17	40100690	56	0,760475
BovineHD1700010957	17	40122540	56	0,760475
BovineHD2000006328	20	21125616	56	0,719878
BovineHD2400008675	24	31892005	56	0,7432
BovineHD2400008681	24	31918220	56	0,786625
BovineHD2900005678	29	19700519	56	0,734518
BovineHD2900005689	29	19723934	56	0,734518
BovineHD2900005712	29	19780921	56	0,778414
BovineHD2900005713	29	19782289	56	0,778414
BovineHD2900005714	29	19788087	56	0,778414
BovineHD2900005715	29	19793238	56	0,778414
BovineHD2900005716	29	19794473	56	0,778414
BovineHD2900007661	29	26246116	56	0,763143
